# Supplementary material for: Geographic Variations in Use of Medicaid Mental Health Services
Source: Atypon-hosted journal article supplement (doi:10.1176/appi.ps.201400337), 2015-03-02
Supplement: appi.ps.201400337.ds001.pdf [file appi.ps.201400337.ds001.pdf]

Figure 1. Distribution of Case Mix–Adjusted MALA-Level Medicaid Mental Health Services Utilization and Spending

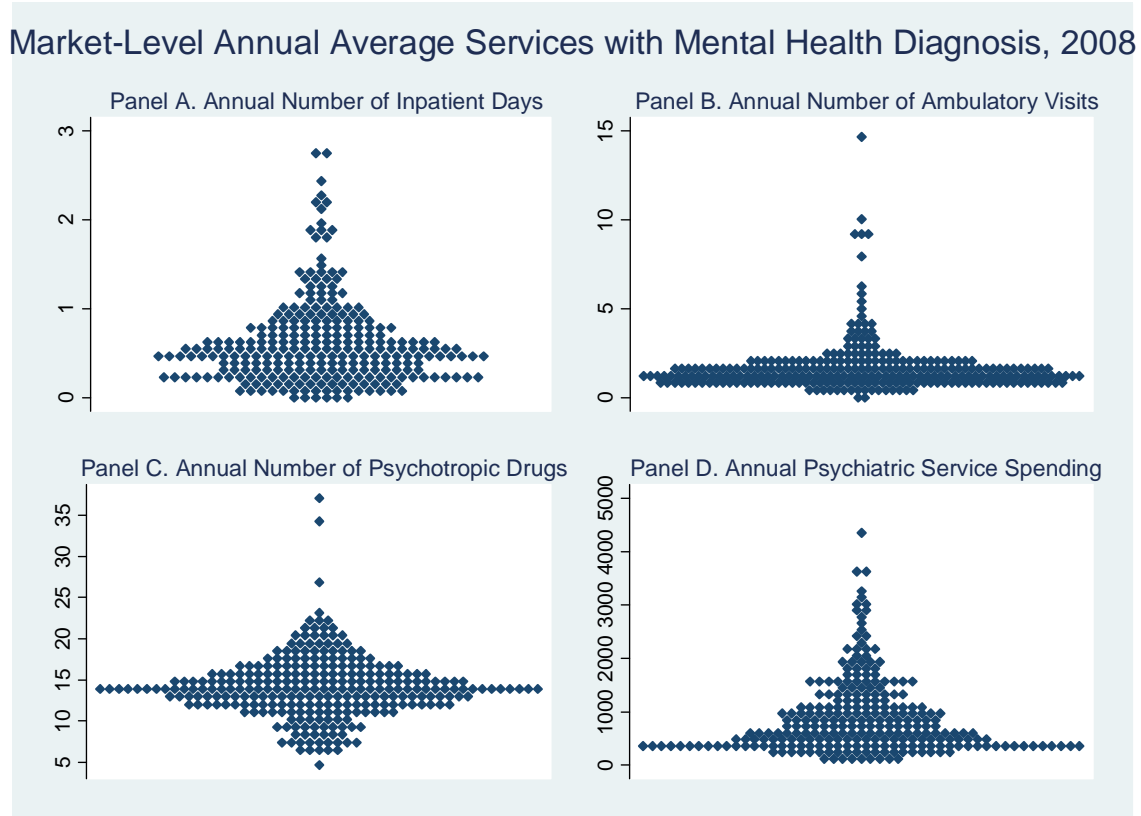

**Table 1. Mental Health Services Utilization and Spending in Disabled Medicaid Beneficiaries, 2008**

| <b>Variable</b>                                            | <b>N</b> | <b>25th<br/>Percentile</b> | <b>Median</b> | <b>75th<br/>Percentile</b> | <b>Mean</b> | <b>Coefficient<br/>of Variation</b> | <b>Intraclass<br/>Correlation<br/>Coefficient</b> |
|------------------------------------------------------------|----------|----------------------------|---------------|----------------------------|-------------|-------------------------------------|---------------------------------------------------|
| Inpatient days                                             | 272      | 0.28                       | 0.51          | 0.80                       | 0.62        | 0.78                                | 0.43                                              |
| Ambulatory visits                                          | 269      | 1.00                       | 1.42          | 1.92                       | 1.77        | 0.90                                | 0.71                                              |
| Prescribed psychotropic drug<br>claims                     | 285      | 12.19                      | 13.89         | 16.03                      | 14.16       | 0.27                                | 0.65                                              |
| Psychiatric services spending,<br>excluding adult day care | 263      | 400.18                     | 695.21        | 1177.46                    | 910.96      | 0.79                                | 0.70                                              |
